# Supplementary material for: Influence of Sodium Humate on the Growth Performance, Diarrhea Incidence, Blood Parameters, and Fecal Microflora of Pre-Weaned Dairy Calves
Source: MDPI journal article supplement (doi:10.3390/ani12010123), 2022-01-05
Supplement: s1 [file s1]

**Supplementary Table S1.** Ingredients and chemical composition of the starter concentrate diet

| Ingredient          | Content (%) | Chemical composition <sup>2</sup> | Content (%) |
|---------------------|-------------|-----------------------------------|-------------|
| Corn                | 40.74       | DM                                | 87.78       |
| Soybean meal        | 35.00       | EE                                | 4.35        |
| Wheat bran          | 2.8         | CP                                | 23.56       |
| Cottonseed meal     | 6.8         | ADF                               | 5.71        |
| Molasses            | 4.0         | NDF                               | 9.82        |
| Wheat meal          | 7.8         | Ash                               | 3.73        |
| CaCO <sub>3</sub>   | 1.63        | Ca                                | 0.81        |
| Soybean oil         | 0.80        | Phosphorus                        | 0.49        |
| NaCl                | 0.10        |                                   |             |
| CaHPO <sub>3</sub>  | 0.10        |                                   |             |
| MgO                 | 0.07        |                                   |             |
| Selenium yeast      | 0.02        |                                   |             |
| Premix <sup>1</sup> | 0.14        |                                   |             |
| Total               | 100.00      |                                   |             |

<sup>1</sup>The premix provided the following per kg of diet: Fe 206.74 mg, Cu 3.49 mg, Zn 108.81 mg, I 0.60 mg, Se 0.44 mg, Mn 79.99 mg, Co 0.36 mg, VA 9000 U, VD 24000 U, VE 47.22 mg.

<sup>2</sup> Analyzed values.
